# Supplementary material
Source: Research Square preprint supplement (doi:10.21203/rs.3.rs-9971277/v1)
Supplement: Supplementary file 1 [file 7f5f77ec546673746dba78be.docx]

**Supplementary Appendix 1**

**Complete Database Search Strategies**

*Systematic Review: Dynamic Serum Sodium Changes in Acute Heart Failure and Short-Term Prognostic Significance*

**PROSPERO ID:** CRD420261299525

**Authors:** Mohamed Mamoun Osman Abdalla, Mohamed Abdelrahim, Abubakr Almardi Mohammed Khojali

**Databases Searched:** PubMed, Embase, Scopus, Dimensions

**Date of Search:** 26 December 2025

**Deduplication:** Conducted via Rayyan, commencing 29 December 2025

**Restrictions / Filters:** None applied. No language, date, or publication type restrictions were imposed. All deduplicated results were screened against predefined inclusion and exclusion criteria during the title/abstract and full-text screening stages.

# **Search Strings by Database**

| **PubMed** | |
| --- | --- |
| **Date Searched** | 26 December 2025 |
| **Filters Applied** | None |
| **Search String** | ("heart failure" OR "acute heart failure" OR "decompensated heart failure" OR CHF)  AND  ("serum sodium" OR hyponatremia OR dysnatremia)  AND  (change* OR correction OR trajectory OR variability OR "delta sodium")  AND  (hospital* OR inpatient*) |

| **Embase** | |
| --- | --- |
| **Date Searched** | 26 December 2025 |
| **Filters Applied** | None |
| **Search String** | ('heart failure' OR 'acute heart failure' OR 'decompensated heart failure' OR CHF)  AND  ('serum sodium' OR hyponatremia OR dysnatremia)  AND  (change* OR correction OR trajectory OR variability OR 'delta sodium')  AND  (hospital* OR inpatient*) |

| **Scopus** | |
| --- | --- |
| **Date Searched** | 26 December 2025 |
| **Filters Applied** | None |
| **Search String** | TITLE-ABS-KEY(("heart failure" OR "acute heart failure" OR "decompensated heart failure" OR CHF)  AND ("serum sodium" OR hyponatremia OR dysnatremia)  AND (change* OR correction OR trajectory OR variability OR "delta sodium")  AND (hospital* OR inpatient*)) |

| **Dimensions** | |
| --- | --- |
| **Date Searched** | 26 December 2025 |
| **Filters Applied** | None |
| **Search String** | ("heart failure" OR "acute heart failure" OR "decompensated heart failure" OR CHF)  AND  ("serum sodium" OR hyponatremia OR dysnatremia)  AND  (change OR changes OR correction OR trajectory OR variability OR "delta sodium")  AND  (hospital OR inpatient) |

*Note: Wildcard truncation (*) was used in PubMed, Embase, and Scopus to capture variant forms (e.g., change*, hospital*). Dimensions does not support wildcard truncation; full-form variants were listed explicitly (change OR changes; hospital OR inpatient).*
